1 Enterprise healthcare physician services in Canada: an environmental  
2 scan

3  
4 Sheryl Spithoff MD MSc (1,2,3), Lana Movic BSc (1)

5  
6 Affiliations

- 7 1. Department of Family and Community Medicine, Women's College Hospital, Toronto,  
8 Canada  
9 2. Department of Family and Community Medicine, University of Toronto, Toronto, Canada  
10 3. Women's College Hospital Research Institute, Women's College Hospital, Toronto,  
11 Canada

12  
13 Corresponding author: Sheryl Spithoff: [sheryl.spithoff@wchospital.ca](mailto:sheryl.spithoff@wchospital.ca)

14  
15 ORCID: SMS <https://orcid.org/0000-0001-6965-473X>

16  
17  
18  
19 Word count: 1519  
20  
21  
22

23  
24  
25  
26  
27  
28  
29  
30  
31  
32  
33  
34  
35  
36  
37  
38  
39  
40  
41  
42  
43  
44  
45  
46  
47  
48  
49  
50  
51  
52  
53  
54  
55  
56  
57  
58  
59  
60

## Abstract

Background: Employers in Canada are increasingly offering physician services to their employees, often through third party workplace “enterprise healthcare” platforms. To date however, little work has been done to understand this method of organizing and delivering care.

Objective: To understand the nature, extent and implications of enterprise healthcare physician services in Canada.

Methods: We conducted structured internet and database searches to identify enterprise healthcare platforms that provided physician services and their public websites. To answer our research question, We extracted data from company websites and linked company documents as well as information from Mergent Intellect, a web-based application with business data on Canadian companies.

Results: We identified nine companies offering enterprise physician services to employees in Canada via 11 enterprise software platforms. According to company claims, over four million Canadian employees and their family members have access to enterprise physician services. All platforms offer virtual physician services and five also facilitate in person visits. Ten of the platforms provide primary care services and one offers only addiction medicine services. Four of the platforms offer to communicate and share information with an employee’s regular primary care provider. Five state they share aggregate or de-identified health data with employers.

Conclusions: Enterprise healthcare companies provide millions of Canadian employees and their families with rapid access to virtual physician services and, in some cases, in person care. These services may disrupt continuity of care (care by the same provider over time) and pose risks to employee privacy. As other Canadians do not have access to these services, enterprise healthcare is also introducing two-tiered healthcare across Canada potentially affecting the sustainability of the public healthcare system.

Keywords: enterprise care; workplace healthcare; physician services; employee health; virtual care; telehealth; healthcare financing; healthcare delivery; routinely collected health data; patient data privacy; privacy; Canada

## 61 Introduction

62 Employers in Canada are increasingly offering physician services to their employees, typically  
63 through a third party company (1–5). The third party companies enable virtual physician  
64 services through a workplace “enterprise healthcare” platform (Box 1). Some also facilitate in  
65 person physician care through the platforms (6). The companies claim the enterprise platforms  
66 improve access to care, leading to lower rates of employee absenteeism (7,8) and a good return  
67 on investment for employers (7–9). Some enterprise healthcare companies may share de-  
68 identified employee health data with employers (10–12). The companies state that data sharing  
69 allows employers to evaluate the health services they provide and identify ways to reduce  
70 employee absenteeism. Data sharing, however, also has implications for employee privacy and  
71 autonomy.

72  
73 Enterprise healthcare differs from the traditional model of healthcare in Canada where most  
74 people receive care from self-employed physicians working independently or in small groups in  
75 community clinics (13). These physicians either bill the provincial/territorial single-payer public  
76 health system – known as “Medicare” – or, much less commonly, bill patients directly (14–16).  
77 Until recently, these physicians, working in the traditional model of care, rarely provided virtual  
78 care; only three percent of Canadians reported a virtual care physician visit in 2018 (17). With  
79 the onset of the Covid-19 pandemic, and the introduction of public funding for virtual care,  
80 more physicians started offering these services (18). In the province of Ontario, for example,  
81 virtual care visits increased 56-fold to comprise over 70% of all visits between March 2020 and  
82 July 2020 (19).

83  
84 Despite the apparent widespread access to enterprise healthcare in Canada, little work has  
85 been done to understand the extent and nature of this method of organizing and delivering  
86 physician services, nor the implications for employees and for the health system. Our research  
87 objective, therefore, was to gain an understanding of the nature, extent and implications of  
88 enterprise healthcare in Canada through a national environmental scan.

### 89 Box 1. Terms used in the article

|                                 |                                                                                                                                                                                                                                                                                   |
|---------------------------------|-----------------------------------------------------------------------------------------------------------------------------------------------------------------------------------------------------------------------------------------------------------------------------------|
| Virtual care (Telemedicine)     | Any interaction between patients and/or members of their circle of care (e.g. physicians, nurses), occurring remotely, using any forms of communication or information technologies with the aim of facilitating or maximizing the quality and effectiveness of patient care (20) |
| Enterprise healthcare           | A method of delivering healthcare to employees, on behalf of the employer, using a third party’s proprietary software platform                                                                                                                                                    |
| Enterprise healthcare companies | The third-party companies contracted to provide enterprise healthcare services to employees, on behalf of employers                                                                                                                                                               |

91  
92

## 93 Methods

94 We conducted structured internet searches between December 3<sup>rd</sup>, 2021 and April 1<sup>st</sup>, 2022 to  
95 identify enterprise platforms that provide physician services to company employees in Canada.  
96 The search terms used consisted of terms pertaining to the topic areas of virtual care, Canada,

97 and enterprise. We ran each of the searches individually and examined the first 50 results  
98 looking for relevant findings. We compared our findings to a list we compiled when conducting  
99 a previous research study examining direct-to-patient virtual care in Canada to ensure our  
100 search terms were identifying all relevant platforms. We then identified the company that  
101 owned the platform.

102

### 103 [Inclusion/exclusion criteria](#)

104 We included platforms if the company could be contracted by an employer to provide physician  
105 healthcare services through a proprietary software platform to employees living in Canada. We  
106 only included companies that provided physician services as these historically are part of  
107 Canadian Medicare, whereas many other clinical services (e.g., counseling) are not. We  
108 included companies with platforms that provided physician visits through both synchronous  
109 (e.g., phone calls, video chat, in person) and asynchronous communication (e.g., text  
110 communication). We excluded companies if they provided services solely to employees living  
111 outside of Canada or if they offered only non-physician services. We only included companies  
112 with platforms using the English language.

113

### 114 [Identification of documents](#)

115 For each enterprise healthcare platform we included, we identified the platform's public  
116 website and any linked websites or documents. We also searched Mergent Intellect, a publicly  
117 accessible, web-based application offering business data for a collection of US and Canadian  
118 private and public corporations (21). This database contains basic company information, as well  
119 as financial, industry, and executive details for over 1.6 million Canadian businesses. It offers  
120 information on corporate structures, including a list of key executives and a complete company  
121 family tree.

122

### 123 [Data extraction and analysis](#)

124 We extracted information on the company's corporate structure, company headquarters,  
125 countries of operation, ownership (publicly-traded or privately held), communication mode(s)  
126 (e.g., in person, text, phone, or video), primary care physician services, specialist services,  
127 payment for physician services (private or public), in person services, system navigator services,  
128 family coverage for services, sharing of data with employers and information on  
129 communication with an employee's regular primary care provider. Where available, we also  
130 collected information on company claims about number of Canadian enterprise clients  
131 (employers) and number of enterprise members (employees and their family members) in  
132 Canada.

133

### 134 [Ethics](#)

135 As we only used publicly available documents, we received a research ethics board exemption  
136 from Women's College Hospital.

137

### 138 [Results](#)

139

140 We identified 11 enterprise healthcare platforms offering physician services to employees in  
 141 Canada. These enterprise care companies claim to provide services to more than 44,000  
 142 companies and 4.5 million employees and their family members (Table 1). Seven of the 11  
 143 companies are publicly-traded. Ten companies are based in Canada and one in the U.S. (Table  
 144 2). All companies offer virtual care physician services and five also arrange in person visits  
 145 through their platform. Ten companies offer primary care and one company offers only  
 146 addiction physician services. Seven provide coordinated access to specialist appointments and  
 147 six provide a system navigator to help employees navigate the health system. Four platforms  
 148 offer to provide information to an employee’s regular primary care provider and five state they  
 149 provide employers with aggregate or de-identified employee health information.

150

151 [Table 1. Companies providing enterprise physician services](#)

152

| Platform name             | Parent company               | Claims about services provided                                                        |
|---------------------------|------------------------------|---------------------------------------------------------------------------------------|
| ALAViDA                   | Lifespeak                    | -                                                                                     |
| Appletree                 | Appletree Medical Group      | -                                                                                     |
| CloudMD                   | CloudMD Software & Services  | 7200 companies (employers)                                                            |
| Dialogue                  | Dialogue Health Technologies | 25,000 plus companies (employers), 1.8 million members (employees and family members) |
| JungoHR                   | JungoHR                      | -                                                                                     |
| Kii                       | CloudMD Software & Services  | -                                                                                     |
| Lifeworks                 | Telus                        | -                                                                                     |
| Maple                     | Maple Corporation            | -                                                                                     |
| Meira Care                | Meira Care                   | -                                                                                     |
| Teladoc                   | Teladoc Health               | 12,000 plus companies (employers)                                                     |
| TELUS Health Virtual Care | Telus                        | 2.8 million members (employees and family members)                                    |

153

154

155 [Table 2. Description of companies providing enterprise physician services in Canada](#)

156

|                               |                                   | Number (%) |
|-------------------------------|-----------------------------------|------------|
| Ownership                     | Privately-held                    | 4 (36%)    |
|                               | Publicly-traded                   | 7 (64%)    |
| Headquarters                  | Canada                            | 10 (91%)   |
|                               | US                                | 1 (9%)     |
| Funding of physician services | Public                            | --         |
|                               | Private                           | --         |
|                               | Not stated                        | 11 (100%)  |
| Medical services              | Primary care services             | 10 (91%)   |
|                               | Addiction physician services only | 1 (10%)    |
|                               | Access to specialist care         | 7 (64%)    |
|                               | System navigators                 | 6 (55%)    |
|                               | Family coverage                   | 5 (45%)    |
| Modality                      | Virtual care                      | 11 (100%)  |
|                               | In person care                    | 5 (45%)    |
| Access                        | 24/7                              | 8 (73%)    |

|              |                                                              |         |
|--------------|--------------------------------------------------------------|---------|
|              | Same day                                                     | 2 (22%) |
| Data sharing | With employee's regular primary care provider                | 4 (36%) |
|              | With employers (aggregate or de-identified health data only) | 5 (45%) |

157 % = percentage

158

159

## 160 Discussion

161 Our environmental scan provides insight into enterprise physician services in Canada.

162 Enterprise healthcare companies provide millions of Canadian employees and their families  
163 with rapid access to virtual physician services and, in some cases, in person care. These services  
164 may disrupt continuity of care (care by the same provider over time) and pose risks to  
165 employee privacy. Further, as many people living in Canada do not have access to these  
166 services, the model is also introducing two-tiered healthcare broadly across Canada. This is  
167 likely to increase disparities in care and costs to the public health system.

168

169 Our analysis indicates that some employees may experience disruptions to continuity of care.

170 Less than half of the platforms enable in-person physician visits, implying patients are expected  
171 to seek care from their regular care provider or the emergency department for complicated  
172 issues. As a result, employees are likely to experience a disruption to continuity of care (care by  
173 the same provider over time), a challenge for effective management of chronic and complex  
174 health conditions (6).

175

176 As some of these enterprise care companies state they share de-identified or aggregate patient  
177 data with employers and/or third parties, this method of delivering healthcare may present  
178 additional risks to employees. Although the risk of re-identification, is likely to be low if the  
179 data are de-identified or aggregated (1,22), sharing data with employers can enable other  
180 privacy-related harms such as surveillance and discrimination. For example, the data can be  
181 used to identify the characteristics of employees who are likely to have complex health  
182 conditions or who may have a high-risk pregnancy (10–12,23). Companies may use this  
183 information to improve services for these types of employees. They may also, however, use this  
184 information in job recruitment algorithms to ensure these individuals are not offered  
185 employment in the first place (24–26).

186

187 Enterprise healthcare is also introducing a two-tiered system, where millions of employees and  
188 family members have access to physician services not available to other Canadians. This may  
189 worsen health disparities. Employees of larger companies are often from a higher socio-  
190 economic stratum than other people living in Canada, and part of a group that already has  
191 better access to care (13), and better health outcomes (21–24). Further, studies show that a  
192 two-tiered system is likely to increase wait-times for those in the public system by luring  
193 physicians and other healthcare providers to the enterprise system (27–29).

194

195 Finally, enterprise healthcare may lead to “cream-skimming” (30,31). As mentioned above,  
196 many enterprise platforms do not offer in person assessments meaning that physicians working  
197 for these platforms can only treat simple medical problems. Patients who have complicated

198 health issues are shunted to the emergency department or back to their regular primary care  
199 provider (28,32,33). This may increase the burden on the public health system (30,31). Recent  
200 research supports this concern. A Canadian study found that patients who had a virtual care  
201 visit with a commercial virtual care platform were more likely to have an emergency  
202 department visit than those who had a virtual care visit with their regular primary care provider  
203 (18).

204

### 205 [Limitations](#)

206 Our study is limited by the fact that we relied on company documents to answer our research  
207 questions. Additionally, we were not able to find information on whether physician services  
208 were billed to the public system, or if companies paid for these services privately.

209

### 210 [Conclusion](#)

211 Enterprise healthcare seeks to provide employees with rapid access to physician services. This  
212 method of organizing and delivering care, however, may also expose employees to harms, as  
213 well as pose threats to the sustainability of the public healthcare systems in Canada. More  
214 research is needed to further explore this method of delivering and funding physician services  
215 in Canada including how the system functions economically, who the system benefits and the  
216 implications for employees, other people in Canada and the publicly-funded health systems.

217

### 218 [Acknowledgements](#)

219 This project received funding from the Social Science and Humanities Council of Canada  
220 (SSHRC). Sheryl Spithoff receives funding from a New Investigator award from the Department  
221 of Family and Community Medicine, University of Toronto.

222

### 223 [Conflicts of interest](#)

224 None declared.

225

### 226 [References](#)

227

228 1. CloudMD. CloudMD Announces Rapid Growth of Enterprise Health Solutions Division  
229 [Internet]. CloudMD Software & Services Inc. [cited 2021 Aug 30]. Available from:  
230 [https://investors.cloudmd.ca/cloudmd-announces-rapid-growth-of-enterprise-health-](https://investors.cloudmd.ca/cloudmd-announces-rapid-growth-of-enterprise-health-solutions-division/)  
231 [solutions-division/](https://investors.cloudmd.ca/cloudmd-announces-rapid-growth-of-enterprise-health-solutions-division/)

232 2. Shoppers Drug Mart. Shoppers Drug Mart and SilverCloud Health bring leading digital  
233 mental health solution to Canadian employers [Internet]. [cited 2021 Mar 30]. Available  
234 from: [https://www.newswire.ca/news-releases/shoppers-drug-mart-and-silvercloud-](https://www.newswire.ca/news-releases/shoppers-drug-mart-and-silvercloud-health-bring-leading-digital-mental-health-solution-to-canadian-employers-840010994.html)  
235 [health-bring-leading-digital-mental-health-solution-to-canadian-employers-](https://www.newswire.ca/news-releases/shoppers-drug-mart-and-silvercloud-health-bring-leading-digital-mental-health-solution-to-canadian-employers-840010994.html)  
236 [840010994.html](https://www.newswire.ca/news-releases/shoppers-drug-mart-and-silvercloud-health-bring-leading-digital-mental-health-solution-to-canadian-employers-840010994.html)

- 237 3. Maple. Businesses [Internet]. [cited 2021 Mar 30]. Available from:  
238 <https://www.getmaple.ca/business/>
- 239 4. Teledact Inc. Gotodoctor.ca to provide on-demand virtual care services to frontline staff of  
240 Union Social Group restaurants [Internet]. [cited 2021 Aug 11]. Available from:  
241 [https://www.newswire.ca/news-releases/gotodoctor-ca-to-provide-on-demand-virtual-](https://www.newswire.ca/news-releases/gotodoctor-ca-to-provide-on-demand-virtual-care-services-to-frontline-staff-of-union-social-group-restaurants-806856625.html)  
242 [care-services-to-frontline-staff-of-union-social-group-restaurants-806856625.html](https://www.newswire.ca/news-releases/gotodoctor-ca-to-provide-on-demand-virtual-care-services-to-frontline-staff-of-union-social-group-restaurants-806856625.html)
- 243 5. PRLive. Digital Healthcare Creating a Potential \$634.9 Billion Opportunity [Internet].  
244 Baystreet.ca. 2021 [cited 2021 Mar 30]. Available from: [/contact/](https://www.baystreet.ca/contact/)
- 245 6. Workplace Health [Internet]. Appletree Medical Group; [cited 2022 Jul 19]. Available from:  
246 [https://appletreemedicalgroup.com/wp-content/uploads/2021/05/Workplace-Health-](https://appletreemedicalgroup.com/wp-content/uploads/2021/05/Workplace-Health-WSIB-2021.pdf)  
247 [WSIB-2021.pdf](https://appletreemedicalgroup.com/wp-content/uploads/2021/05/Workplace-Health-WSIB-2021.pdf)
- 248 7. Virtual Care | TELUS Health [Internet]. TELUS. [cited 2022 Apr 13]. Available from:  
249 [https://www.telus.com/en/health/organizations/group-health-](https://www.telus.com/en/health/organizations/group-health-benefits/employers/virtual-care)  
250 [benefits/employers/virtual-care](https://www.telus.com/en/health/organizations/group-health-benefits/employers/virtual-care)
- 251 8. The Maple experience [Internet]. Maple. [cited 2022 Apr 13]. Available from:  
252 <https://www.getmaple.ca/business/experience/>
- 253 9. Normandeau M. What makes Dialogue a valued investment in organizational wellness?  
254 [Internet]. [cited 2022 Apr 13]. Available from:  
255 <https://www.dialogue.co/en/blog/dialogue-valued-investment-organizational-wellness>
- 256 10. Companies Are Using Big Data To Track Employee Health And Pregnancies [Internet].  
257 Popular Science. 2016 [cited 2022 Apr 10]. Available from:  
258 [https://www.popsci.com/companies-use-big-data-to-track-employee-health-and-](https://www.popsci.com/companies-use-big-data-to-track-employee-health-and-pregnancies/)  
259 [pregnancies/](https://www.popsci.com/companies-use-big-data-to-track-employee-health-and-pregnancies/)
- 260 11. Board TE. Opinion | Protecting Employees' Health Data. The New York Times [Internet].  
261 2016 Mar 26 [cited 2022 Apr 10]; Available from:  
262 [https://www.nytimes.com/2016/03/27/opinion/sunday/protecting-employees-health-](https://www.nytimes.com/2016/03/27/opinion/sunday/protecting-employees-health-data.html)  
263 [data.html](https://www.nytimes.com/2016/03/27/opinion/sunday/protecting-employees-health-data.html)
- 264 12. Mark Witte: How to make employee health data work for your business and employees  
265 [Internet]. HRreview. 2019 [cited 2022 Apr 10]. Available from:  
266 [https://www.hrreview.co.uk/analysis/mark-witte-how-to-make-employee-health-data-](https://www.hrreview.co.uk/analysis/mark-witte-how-to-make-employee-health-data-work-for-your-business-and-employees/116608)  
267 [work-for-your-business-and-employees/116608](https://www.hrreview.co.uk/analysis/mark-witte-how-to-make-employee-health-data-work-for-your-business-and-employees/116608)
- 268 13. Martin D, Miller AP, Quesnel-Vallée A, Caron NR, Vissandjée B, Marchildon GP. Canada's  
269 universal health-care system: achieving its potential. *Lancet*. 2018;391(10131):1718–35.



- 270 14. The illegality of private healthcare in Canada [CMAJ - March 20, 2001] [Internet]. [cited  
271 2022 Apr 10]. Available from: [https://www.nlc-bnc.ca/eppp-](https://www.nlc-bnc.ca/eppp-archive/100/201/300/cdn_medical_association/cmaj/vol-164/issue-6/0825.asp)  
272 [archive/100/201/300/cdn\\_medical\\_association/cmaj/vol-164/issue-6/0825.asp](https://www.nlc-bnc.ca/eppp-archive/100/201/300/cdn_medical_association/cmaj/vol-164/issue-6/0825.asp)
- 273 15. Contandriopoulos D, Law MR. Policy changes and physicians opting out from Medicare in  
274 Quebec: an interrupted time-series analysis. CMAJ. 2021 Feb 16;193(7):E237–41.
- 275 16. Flood CM. Two-tier healthcare after Cambie - Colleen M. Flood, 2021. Healthcare  
276 Management Forum [Internet]. 2021 Mar 2 [cited 2022 Feb 1]; Available from:  
277 <http://journals.sagepub.com/doi/full/10.1177/0840470421994304>
- 278 17. Connecting patients for better health: 2018 [Internet]. Canada Health Infoway; 2018 [cited  
279 2022 Apr 7]. Available from: [https://www.infoway-](https://www.infoway-inforoute.ca/en/component/edocman/3564-connecting-patients-for-better-health-2018/view-document?Itemid=0)  
280 [inforoute.ca/en/component/edocman/3564-connecting-patients-for-better-health-](https://www.infoway-inforoute.ca/en/component/edocman/3564-connecting-patients-for-better-health-2018/view-document?Itemid=0)  
281 [2018/view-document?Itemid=0](https://www.infoway-inforoute.ca/en/component/edocman/3564-connecting-patients-for-better-health-2018/view-document?Itemid=0)
- 282 18. Lapointe-Shaw L, Salahub C, Bhatia RS, Desveaux L, Glazier RH, Hedden L, et al.  
283 Characteristics and healthcare use of patients attending virtual walk-in clinics: a cross-  
284 sectional analysis [Internet]. medRxiv; 2022 [cited 2022 Mar 12]. p. 2022.02.28.22271640.  
285 Available from: <https://www.medrxiv.org/content/10.1101/2022.02.28.22271640v1>
- 286 19. Glazier RH, Green ME, Wu FC, Frymire E, Kopp A, Kiran T. Shifts in office and virtual  
287 primary care during the early COVID-19 pandemic in Ontario, Canada. CMAJ. 2021 Feb  
288 8;193(6):E200–10.
- 289 20. Shaw J, Jamieson T, Agarwal P, Griffin B, Wong I, Bhatia RS. Virtual care policy  
290 recommendations for patient-centred primary care: findings of a consensus policy  
291 dialogue using a nominal group technique. J Telemed Telecare. 2018 Oct;24(9):608–15.
- 292 21. Mergent Intellect [Internet]. Toronto Public Library. [cited 2022 Jan 17]. Available from:  
293 <https://www.torontopubliclibrary.ca/detail.jsp?Entt=RDMEDB0188&R=EDB0188>
- 294 22. Big Data in Healthcare: How Employers, Providers, and Brokers Are Using Healthcare  
295 Analytics [Internet]. [cited 2021 Mar 30]. Available from:  
296 [https://www.artemishealth.com/blog/big-data-in-healthcare-how-employers-providers-](https://www.artemishealth.com/blog/big-data-in-healthcare-how-employers-providers-and-brokers-are-using-healthcare-analytics)  
297 [and-brokers-are-using-healthcare-analytics](https://www.artemishealth.com/blog/big-data-in-healthcare-how-employers-providers-and-brokers-are-using-healthcare-analytics)
- 298 23. Landi H. Modern Health rolls out data tool for employers to better pinpoint workers'  
299 mental health needs [Internet]. Fierce Healthcare. 2021 [cited 2022 Apr 10]. Available  
300 from: [https://www.fiercehealthcare.com/tech/modern-health-rolls-out-data-tool-for-](https://www.fiercehealthcare.com/tech/modern-health-rolls-out-data-tool-for-employers-as-companies-ramp-up-efforts-to-address)  
301 [employers-as-companies-ramp-up-efforts-to-address](https://www.fiercehealthcare.com/tech/modern-health-rolls-out-data-tool-for-employers-as-companies-ramp-up-efforts-to-address)
- 302 24. Regan PM, Jesse J. Ethical challenges of edtech, big data and personalized learning:  
303 twenty-first century student sorting and tracking. Ethics Inf Technol. 2019 Sep  
304 1;21(3):167–79.

- 305 25. O’Neil C. Weapons of Math Destruction: How Big Data Increases Inequality and Threatens  
306 Democracy. 1st edition. New York: Crown; 2016. 272 p.
- 307 26. Ebeling MFE. Healthcare and Big Data: Digital Specters and Phantom Objects. 1st ed. 2016  
308 edition. Vol. p.43. New York: Palgrave Macmillan; 2016.
- 309 27. Duckett SJ. Private care and public waiting. Aust Health Rev. 2005 Feb;29(1):87–93.
- 310 28. Lee SK, Rowe BH, Mahl SK. Increased Private Healthcare for Canada: Is That the Right  
311 Solution? Healthc Policy. 2021 Feb;16(3):30–42.
- 312 29. Cheng TC, Kalb G, Scott A. Public, private or both? Analyzing factors influencing the labour  
313 supply of medical specialists. Canadian Journal of Economics/Revue canadienne  
314 d’économique. 2018;51(2):660–92.
- 315 30. Cheng TC, Haisken-DeNew JP, Yong J. Cream skimming and hospital transfers in a mixed  
316 public-private system. Soc Sci Med. 2015 May;132:156–64.
- 317 31. Duckett S. Commentary: The Consequences of Private Involvement in Healthcare – The  
318 Australian Experience. Healthc Policy. 2020 May;15(4):21–5.
- 319 32. Davidson A. Parallel Payers, Privatization and Two-Tier Healthcare in Canada.  
320 HealthcarePapers [Internet]. 2008 May 15 [cited 2021 Aug 30];8(3). Available from:  
321 [https://www.longwoods.com/content/19793/healthcarepapers/parallel-payers-](https://www.longwoods.com/content/19793/healthcarepapers/parallel-payers-privatization-and-two-tier-healthcare-in-canada)  
322 [privatization-and-two-tier-healthcare-in-canada](https://www.longwoods.com/content/19793/healthcarepapers/parallel-payers-privatization-and-two-tier-healthcare-in-canada)
- 323 33. Davidson A. Under the Radar: Stealth Development of Two-Tier Healthcare in Canada.  
324 Healthc Policy. 2006 Jul;2(1):25–33.
- 325  
326
